# Supplementary material
Source: ML conference proceedings conference paper supplement (https://openaccess.thecvf.com/content/CVPR2021/html/Boudiaf_Few-Shot_Segmentation_Without_CVPR_2021_paper.html)
Supplement: Supplementary file 1 [file Boudiaf_Few-Shot_Segmentation_Without_CVPR_2021_supplemental.pdf]

## A. Domain shift experiment

In Table 7, we show the details of the cross-domain folds used for the domain-shift experiments. Also, in Table 8, the per-fold results of the same experiment are available.

Table 7: Cross-domain folds.

|                              | Dataset    | Fold 0                                                                                                                                       | Fold 1                                                                                                             | Fold 2                                                                                                                         | Fold 3                                                                                                                  |
|------------------------------|------------|----------------------------------------------------------------------------------------------------------------------------------------------|--------------------------------------------------------------------------------------------------------------------|--------------------------------------------------------------------------------------------------------------------------------|-------------------------------------------------------------------------------------------------------------------------|
| Excluded<br>from<br>training | MS-COCO    | Person, Airplane, Boat,<br>P. meter, Dog, Elephant                                                                                           | Bus, T. light, Bicycle,<br>Bench, Horse, Bear,                                                                     | Car, Fire H., Bird,<br>Train, Sheep, Zebra                                                                                     | Motorcycle, Stop, Cat,<br>Truck , Cow, Giraffe,                                                                         |
|                              |            | Backpack, Suitcase, S. ball,<br>Skateboard, W. glass, Spoon,<br>Sandwich, Hot dog,<br>Chair, D. table, Mouse,<br>Microwave, Fridge, Scissors | Umbrella, Frisbee, Kite,<br>Surfboard, Cup, Bowl,<br>Orange, Pizza, Couch,<br>Toilet, Remote, Oven,<br>Book, Teddy | Handbag, Skis, B. bat,<br>T. racket, Fork, Banana,<br>Boroccoli, Donut, P.plant,<br>TV, Keyboard, Toaster,<br>Clock, Hairdrier | Tie, Snowboard, B.glove,<br>Bottle, Knife, Apple,<br>Carrot, Cake, Bed,<br>Laptop, Cellphone, Sink,<br>Vase, Toothbrush |
| Test<br>classes              | PASCAL-VOC | Airplane, boat, chair,<br>D. table, Dog, Person                                                                                              | Horse, Sofa,<br>Bicycle, Bus                                                                                       | Bird, Car, P.plant<br>Sheep, Train, TV                                                                                         | Bottle, Cat,<br>Cow, Motorcycle                                                                                         |

Table 8: Per-fold domain-shift results on COCO-20<sup>i</sup> to PASCAL-5<sup>i</sup> experiment. Best results in bold.

| Method             | Backbone | 1 shot      |             |             |             |             | 5 shot      |             |             |             |             |
|--------------------|----------|-------------|-------------|-------------|-------------|-------------|-------------|-------------|-------------|-------------|-------------|
|                    |          | Fold-0      | Fold-1      | Fold-2      | Fold-3      | Mean        | Fold-0      | Fold-1      | Fold-2      | Fold-3      | Mean        |
| RPM [38] (ECCV'20) |          | 36.3        | 55.0        | 52.5        | 54.6        | 49.6        | 40.2        | 58.0        | 55.2        | 61.8        | 53.8        |
| PFENet [33]        | ResNet50 | 43.2        | <b>65.1</b> | <b>66.5</b> | 69.7        | 61.1        | 45.1        | 66.8        | 68.5        | <b>73.1</b> | 63.4        |
| RePRI (ours)       |          | <b>52.2</b> | 64.3        | 64.8        | <b>71.6</b> | <b>63.2</b> | <b>56.5</b> | <b>68.2</b> | <b>70.0</b> | <b>76.2</b> | <b>67.7</b> |
| Oracle-RePRI       | ResNet50 | 69.6        | 71.7        | 77.6        | 86.2        | 76.2        | 73.5        | 74.9        | 82.2        | 88.1        | 79.7        |

## B. Results of the 10-shot experiments

In Table 9, we give the per-fold results of the 10-shot experiments.

Table 9: Per-fold 10-shots results on PASCAL-5<sup>i</sup> and COCO-20<sup>i</sup>. Best results in bold.

| Method             | Backbone | PASCAL-5 <sup>i</sup> |             |             |             |             | COCO-20 <sup>i</sup> |             |             |             |             |
|--------------------|----------|-----------------------|-------------|-------------|-------------|-------------|----------------------|-------------|-------------|-------------|-------------|
|                    |          | Fold-0                | Fold-1      | Fold-2      | Fold-3      | Mean        | Fold-0               | Fold-1      | Fold-2      | Fold-3      | Mean        |
| RPM [38] (ECCV'20) |          | 56.1                  | 68.2        | 53.9        | 52.3        | 57.6        | 30.9                 | 39.2        | 28.2        | 34.0        | 33.1        |
| PFENet [33]        | ResNet50 | 63.1                  | 70.6        | 56.6        | 58.2        | 62.1        | 36.9                 | 43.9        | 38.9        | 39.1        | 39.7        |
| RePRI (ours)       |          | <b>65.7</b>           | <b>71.9</b> | <b>73.3</b> | <b>61.2</b> | <b>68.1</b> | <b>41.6</b>          | <b>48.2</b> | <b>42.1</b> | <b>44.5</b> | <b>44.1</b> |
| Oracle-RePRI       | ResNet50 | 75.6                  | 81.0        | 82.1        | 75.6        | 78.6        | 57.5                 | 64.7        | 56.6        | 56.1        | 58.7        |

### C. Qualitative results

In Figure 4, we provide some qualitative results on PASCAL-5<sup>i</sup> that show how our method helps refining the initial predictions of the classifier.

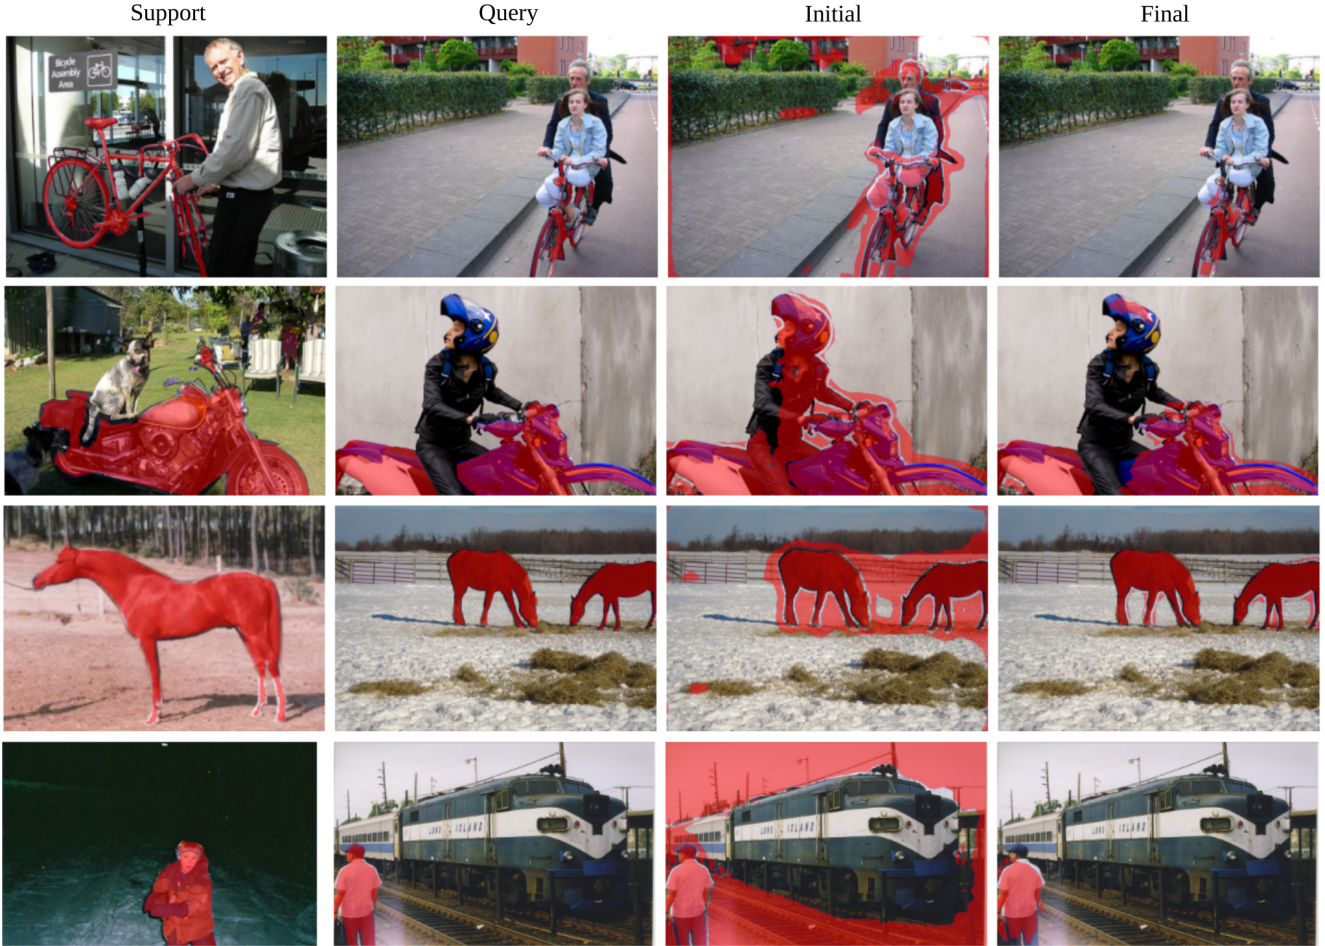

Figure 4: Qualitative results on PASCAL 5<sup>i</sup>. *Initial* column refers to the predictions right after initializing the prototypes, while *Final* column refers to the prediction after running our inference. Best viewed in colors in high resolution.
